# Supplementary material
Source: publisher site journal article supplement (https://www.dovepress.com/article/469855)
Supplement: Supplementary file 1 [file get_supplementary_file.php]

**SUPPLEMENTARY MATERIALS**

**Supplementary File 1: SingHypertension Study Qualitative Interview Guide - Healthcare providers**

**Supplementary File 2: SingHypertension Study Qualitative Interview Guide – Patients**

**Supplementary File 3: Codebook – Healthcare Providers**

**Supplementary File 4: Codebook – Patients**

**Supplementary Table 1a: Retrospective Acceptability Through HCPs’ Perspective**

**Supplementary Table 1b: Retrospective Acceptability Through Patients’ Perspective**

**Supplementary Table 1c: Feedback on SingHypertension Intervention, Sub-themes and Illustrative Quotes**

|  |  |  |
| --- | --- | --- |
|  |  |  |

**Supplementary File 1 - SingHypertension Study Qualitative Interview Guide – Healthcare Providers**

**We are collecting information to help us understand the perceptions of key stakeholders on the delivery and acceptability of the multi-component intervention (MCI) in the SingHypertension study. Additionally, we would like to understand how the COVID-19 pandemic has impacted the healthcare service delivery and utilisation of patients with chronic conditions like hypertension.**

Interviewee’s current position: _______________________________________

**Introduction**

1. Could you tell me the scope of your position (role and responsibilities) in the clinic?
2. How does your work relate to the medical care of patients with hypertension?

**PART 1 (SingHT study): Understanding delivery of hypertension services and acceptability of MCI in SingHypertension study**

1. Can you tell us your opinion, and what you feel about the SingHypertension study?

1. How did you manage and cope with your regular duties? How much of your effort is needed to deliver the intervention in terms of time and attention?
2. How easy or difficult was it for you to follow the treatment algorithm (for doctors) or motivational interviewing (for nurses)?

- Which component of SingHypertension study is most cumbersome?

1. Has anything changed in the care of hypertensive patients due to the COVID-19 pandemic ever since the DORSCON orange alert?

- Changes in staff/workforce allocation workflow protocols and procedures in light of the pandemic.
- Have you brought in any extra staff for clinical care (new hires, casual staff and overtime) to respond to the COVID-19 situation in your clinic/the hospital/health system? If yes, please describe

1. What changes has your clinic/health system made in order to ensure that these patients can continue to effectively manage their chronic condition-like hypertension?

-What were your considerations in making these changes?

-What support did you need? (Would you need in the future?)

1. Can you tell us what you understand about the SingHypertension study?
2. Prior to this program, what was the standard practice (or any guidelines) for managing patients with uncontrolled BP? What services do you think are key to managing hypertension optimally in primary care?
3. In your opinion, what are the concerns in managing hypertension? Form HCP’s perspective, and from perspective of patients
4. What is your goal of care for hypertension patients? How well does the SingHypertension study fit with your goals?
5. For Doctors: How do you think the algorithm helped you in the management of hypertensive patients? Any additional elements are desired?
6. What are your views on the nurses’ motivational conversation on management of BP? How do they help you in terms of overall management and benefit the patients?
7. What do you think are the benefits of such a program for individuals with uncontrolled hypertension? Which components of SingHypertension study do you think are most beneficial and why?
8. In the COVID-19 pandemic what have been the concerns or issues using RAS blockers in your hypertensive patients? How did COVID-19 risk affect your practice?

1. Tell us about your ability to follow the elements of the intervention

**For doctors**

1. How confident were you in risk stratification and prescribing single pill combinations (SPC) antihypertensive medication? What helped you become confident in hypertension management?
2. What are your views on the training sessions you attended? Any suggestions for improvement?
3. You must have used the high-CVD checklists, how confident were you in using the checklist? How did the checklist help you in your management decisions?
4. What issues do hypertensive patients’ discuss with you commonly? What do you think are the most significant aspect that needs to be addressed when designing such programs?
5. What would you have to give up in order to engage with these practices?

**For nurses**

1. How confident were you in performing motivational interviewing for patients? What helped you to become confident? How did the patients receive your motivational conversation?
2. What are your views on the training sessions you attended? Any suggestions for improvement?
3. You used the checklists during the telephone calls, how confident were you in using them? How did the checklists help you in your tasks?
4. Which aspect of the care – HBPM or lifestyle behaviour messages (salt/exercise/fruits-vegetables/smoking) did you think were important to reiterate to the patients?
5. What issues do hypertensive patients’ discuss with you commonly? What do you think are the most significant aspect that needs to be addressed when designing such programs?
6. What did you have to give up in order to engage in these practices? Were those services affected? If yes, How so?
7. If the hypertension management program were to more widely adopted across all polyclinics, would you recommend it in your and other clinics? If yes why, if not why not?
8. How can we re-design the program to scale up the services focusing on hypertension? What are the key factors that would make the larger implementation successful?
9. In your view, what kind of support or strategy is needed to implement this kind of a program across polyclinics?
10. To make programs more sustainable, what approaches do you think will work in the long term?
11. Do you think other chronic conditions need similar structured programs? What are those (name 3-4 most important ones)

**PART 2 (COVID)**

**Changes in healthcare services and patient outcomes during pandemic**

1. What healthcare services has your clinic/health system prioritised and postponed for those living with chronic conditions like hypertension?
   1. What were your considerations when prioritising and/or postponing the healthcare services?
   2. How do you follow up with patients who are managing their chronic condition(s) like hypertension at home (i.e. patients not coming into the hospital)?
   3. How do patients get supply of hypertension medications?
2. Have you observed any suboptimal health outcomes as a result of delayed elective procedures and routine care for these patients during the pandemic?
   1. If yes, what health outcomes have you observed? Are there sub-groups within this group of patients that require more attention?
   2. If no, why do you think there have been little impacts on patients’ health outcomes?

**Long-term impact of triage**

1. How do you anticipate the partial suspension of healthcare delivery will affect utilisation of healthcare services for medically vulnerable patients- for eg. hypertensives with heart disease and diabetes, and elderly, assuming COVID-19 pandemic is over in the next 3, 6, 12 months’ time?
2. In your view, how do you think the health needs of these medically vulnerable patients will evolve after the pandemic?
3. What dimensions (e.g. quality of care, continuity, coordination, comprehensiveness)/types of healthcare services will meet the needs of these patients?
4. Do you have any suggestions for SingHypertension study in light of COVID-19 pandemic?

**New models of care during pandemic**

1. Have you initiated, observed or experienced alternative modes of healthcare delivery during COVID-19 pandemic such as telehealth or outreach programs (online chat, video conferencing/tele-consultation, delivery of medications) to maintain/enable patient access to healthcare services, ease the burden on strained health systems and reduce patient-provider encounters?
2. If yes, can you share your experience?
3. What have been the major facilitators and barriers to the use of this alternative mode of healthcare delivery?
4. What potential solutions would help overcome the [mentioned] barriers that hinder the new model of care?
5. Would you adopt the new model of care post-pandemic? (if initiated during covid-19 pandemic). Why/Why not
6. Do you have any suggestions for SingHypertension study in light of COVID-19 pandemic?

* Lastly, one of our research groups is currently developing simulation models to evaluate the impact of COVID-19 on health system’s ability to deliver services for medically vulnerable population. In your area of work (primary care/ hypertension), are there particular questions that you would like the modelling team to predict/answer to help your work?

** Ask only if appropriate and based on the response to the last question.*

Thanks for your participation.

**Supplementary File 2: SingHypertension Study Qualitative Interview Guide – Patients**

**We are collecting information to help us understand the perceptions of patients to the acceptability of the multi-component intervention (MCI) in the SingHypertension study. Additionally, we would like to understand how the COVID-19 pandemic has impacted the healthcare utlilization and disease management of patients with chronic conditions like hypertension.**

**Introduction**

1. Can you share with me what chronic condition(s) you are currently living with? [If having comorbidities] which health issues do you seek care most/frequently?
2. How the condition(s) affected your daily life prior to the COVID-19 pandemic?

**PART 1-SingHT: Understanding healthcare utilization for hypertension and acceptability of MCI in SingHypertension study**

1. Can you tell us your opinion, and what you feel about the blood pressure study you were part of?
2. How did you feel about the treatment you received for blood pressure -like medications Single pill combination- Hyzaar? How did the combination pill benefit you?
3. How did you feel about talking to nurses in the clinic and over telephone (eg diet, exercise, salt intake, fruits/vegetables etc)? How much effort did it require from you to be involved in terms of time and attention with the telephone calls?
4. How easy or difficult was it for you to respond to the nurses’ phone calls? Any suggestions on how this can be improved?
5. Which component of the Singhypertension study was most cumbersome?
6. What do you feel about the medication discount you got for blood pressure medication (Hyzaar)? Was it helpful? Did you continue the medicine after the study subsidy was over?
7. What efforts do you normally take to control BP? How do you think this Hypertension study helped you manage your blood pressure?
8. Prior to joining this program, how was your blood pressure managed? Has anything changed? If so, what?
9. What is your goal of blood pressure management? How well does this program fit with your goals?
10. What do you think are the benefits of being in this program for individuals with uncontrolled blood pressure?
11. Which components of SingHypertension study are most beneficial?
12. In the COVID-19 pandemic, did you have any concerns regarding BP management, and use of some blood pressure medications?

1. Tell me about your ability to follow the elements of the intervention
2. How confident were you in taking your blood pressure and cholesterol (if they were on) medications? What are the challenges with respect to taking medications for BP and other issues?
3. How did the doctor’s management for BP help you control BP? What are the key aspects of BP management do you generally want to know and discuss with your doctor?
4. Do you monitor BP at home BP? If yes, how confident were you performing home BP? If no, are there any reasons to not use home BP monitors?
5. What issues (with lifestyle or medications) did you have when managing your BP? How did the nurses’ advice help you? (reducing salt intake, physical activity, eating fresh fruits and vegetables, smoking cessation etc) Which aspect did you want to discuss more with the nurses?
6. How has your self-management for BP control changed in the course of the 2 years of the study? How do you think you will manage these lifestyle changes (eg. low salt intake or increasing fruits and vegetables in diet) in the future independently?
7. What did you have to give up in order to engage with these practices?
8. If the hypertension management program were to more widely adopted across all polyclinics, would you recommend it to other patients in your and other clinics? If yes why, if not why not?
   1. How can we scale up this program, and what strategy can help us to scale up to benefit other patients
   2. What other disease/conditions do you think are important to address from patient’s viewpoint when we plan the scale-up?
   3. Do you have any suggestions for SingHypertension study in light of COVID-19 pandemic?

**PART 2 COVID**

**Impact of the COVID-19 pandemic on chronic disease management**

1. How did you manage (e.g. follow-up appointment, treatment) your chronic condition(s) prior to the pandemic? What did your routine look like?

*2. If you compare things**before and during the COVID-19 pandemic, how much the COVID-19 pandemic affected your ability to manage your blood pressure at home on a scale of 1-5? (1= no impact, 5=very much)*

- *Medications you need*
- *Therapy/treatment*
- *Exercise*
- *Diet/nutrition*
- *Sleep and rest*
- *Use of medical devices (Home BP monitors)*
  1. What have been the main challenges and concerns in the management of your condition(s)? [if multiple conditions, please probe if there are any condition specific issues]
  2. How do you personally cope with these challenges?

How would you rate the impact of pandemic on your daily activities/function on scale of 1-5 (1= not at all, 5=very much)

**Healthcare utilization and needs during the COVID-19 pandemic- Patients from polyclinics**

- 1. During the COVID-19 pandemic (since January) and circuit breaker, did you need healthcare services at primary care clinics or hospitals? If so, did you use the healthcare services?

If yes:

- - 1. What healthcare services did you use?
    2. Was there anything that hindered timely access to the healthcare services you needed? (e.g. waiting time, delayed or postponed appointment scheduling)
    3. How did the above [factors] impact the management of your chronic condition(s)?
    4. What is your overall experience of seeking healthcare services during pandemic? (scheduling, access, quality of care, coordination, communication/information) *how would you rate your experience on a scale of 1-10 (10 being the best experience)?*
    5. How would you compare your experience prior and during pandemic? (scheduling, access, quality of care, coordination, communication/information)

If no:

1. What made you decide not to seek the services?
2. How has the [missed appointments/non-seeking of the healthcare services] impacted the management of your chronic condition(s) in any ways?
   1. Thinking of the recent months since the onset of the COVID-19 pandemic, to what extent do you think that you have received adequate follow-up care from healthcare services to manage your conditions?
3. If inadequate, what are your main concerns and needs in relation to the use of healthcare services?
4. How do you think these concerns can be addressed? What support do you need?

**Experience of and perception towards alternative provision of healthcare services during pandemic**

1. More and more medical practices are using telehealth including online chat and live video conferencing tools to connect with patients. What are your experience and views of the telehealth and online appointment?
2. Have you used the telehealth services before? If yes, can you share your experience?
3. Would you be willing to use it? If no, what are the anticipated challenges and drawbacks?
4. What other ways healthcare services and providers can support patients like yourself to manage your health better at this time as a result of the circuit breaker/pandemic?
5. Do you have any suggestions for SingHypertension study in light of COVID-19 pandemic?

Is there anything else that we didn’t talk about today that you think is important for us to know?

Thanks for your participation.

**Supplementary File 3: Codebook – Healthcare Providers (HCPs)**

| **Name** | **Description** |
| --- | --- |
| **1 - Affective Attitude** | How an individual feels about the intervention? |
| Positive | The individual feels good about the intervention  Sample code words / phrases: adequate support, Good FDC meds, good program, happy patients, protocol & MI training, useful MI, Useful protocol, useful protocol, checklist & algorithm |
| Negative | The individual does not feel good about the intervention.  Sample code words / phrases: difficult patients, inadequate training sessions, lack of shared decision making, medications issues, MI Implementation, not generalizable, restrictive checklist and algorithms, short consultation, unhappy patients |
| Unable to recall or comment |  |
| **2 - Burden** | The perceived amount of effort that is required to participate in the intervention |
| Manageable | The intervention is manageable and not burdensome/ did not require too much of an effort from the participant. |
| Burdensome | Difficulties encountered while implementing the intervention or lots of efforts required from the participant while implementing the intervention |
| **3 - Ethicality** | The extent to which the intervention has good fit with an individual's value system |
| Good fit | The intervention has a good fit with the individual's value system |
| Not good fit | The intervention does not fit well with the individual's value system |
| **4 - Intervention Coherence** | The extent to which the participant understands the intervention and how it works |
| Understands | The individual has an understanding of the intervention and how it works |
| Does not understand | The individual does not have an understanding of the intervention and how it works |
| **5 - Opportunity Costs** | The extent to which benefits, profits or values must be given up to engage in the intervention. |
| Give up | The individual needs to give up benefits, profits or values to engage in the intervention |
| Did not give up | The individual does not need to give up benefits, profits or values to engage in the intervention |
| **6 - Perceived Effectiveness** | The extent to which the intervention is perceived as likely to achieve its purpose. |
| Attainable | The individual perceives as likely to achieve its purpose |
| Unattainable | The individual perceives as unlikely to achieve its purpose |
| **7 - Self- efficacy** | The participant's confidence that they can perform the behaviour(s) required to participate in the intervention. |
| Confident | The individual is confident that he/she can perform the behaviour (s) required to participate in the intervention |
| Not confident | The individual is not confident that they can perform the behaviour(s) required to participate in the intervention |
| **SingHTN - Suggestions & Scalability** | Suggestions to improve, and recommendations on scaling up the intervention to other health conditions, other polyclinics, other polyclinic clusters |
| Scalability |  |
| Conditions (others) | Suggestions to expand the program for other chronic conditions like diabetes, asthma etc. |
| No |  |
| Yes |  |
| Polyclinics (others) | Suggestions to expand the program to other SingHealth and other cluster polyclinics. |
| No |  |
| Yes |  |
| Suggestions to improve | Suggestions to improve the SingHTN programme.  Sample code words / phrases: better checklist, algorithm, protocol; better costs, better manpower allocation, and team integration & support, better medication management, better nurse consultation & monitoring, better training, fit to patient’s availability, no language barrier, shared decision making, subsidized medications and equipment, telehealth approach, time factors to address, others |

**Supplementary File 4: Codebook – Patients**

| **Name** | **Description** |
| --- | --- |
| **1 - Affective Attitude** | How an individual feels about the intervention? |
| Positive | The individual feels positive about the intervention and/or recommends the intervention. Sample code words / phrases: good, well, positive, happy, satisfied, beneficial, lucky, useful, thankful, nice, comfortable. |
| Negative | The individual does not feel positive about the intervention and does not recommend the intervention. Sample code words / phrases: confusing, etc. |
| **2 - Burden** | The perceived amount of effort that is required to participate in the intervention. Patient Categories: Nurses’ Phone Calls and Other Categories (Lifestyle, Medication, & Doctors’ Appointments) |
| Manageable | The intervention is manageable and not burdensome or did not require too much of an effort from the participant. Sample code words / phrases: doesn’t take up a lot of time, minimum effort, no disturbance, not difficult, easy. |
| Burdensome | Difficulties encountered while implementing the intervention or lots of efforts required from the participant while implementing the intervention. Sample code words: pressurized, a lot of effort, difficult, cumbersome, troublesome. |
| **3 - Ethicality** | The extent to which the intervention has good fit with an individual's value system |
| Good fit | The intervention has a good fit with the individual's value system. Sample code words / phrases: your research can help us, people really took care of you, very helpful, at least you know what the illness was about. |
| Not good fit | The intervention does not fit well with the individual's value system. Sample code words / phrases: [any mention that study is not ethical, etc]. |
| **4 - Intervention Coherence** | The extent to which the participant understands the intervention and how it works |
| Understands | The individual has an understanding of the intervention or how it works. Sample code words / phrases: to prevent stroke, don’t want to have a heart attack, cut down on things that make my blood pressure go up, to complement medicine with lifestyle, etc. |
| Does not understand | The individual does not have an understanding of the intervention or how it works. Sample code words / phrases: don’t know what [the study] was, etc. |
| **5 - Opportunity Costs** | The extent to which benefits, profits or values must be given up to engage in the intervention. |
| No | The individual does not need to give up benefits, profits or values to engage in the intervention or the costs were minimal. Sample code words / phrases: I haven’t given up anything, no sacrifices made. |
| Yes | The individual needs to give up benefits, profits or values to engage in the intervention. Sample code words / phrases: timeframe itself not enough for me, etc. |
| **6 - Perceived Effectiveness** | The extent to which the intervention is perceived as likely to achieve its purpose. |
| Attainable | The individual perceives that the intervention has achieved its purpose and met personal goals. Sample code words / phrases: definitely, helpful, well, a personal win, decreased blood pressure, guides the individual, [list of ways in which program met their own personal goals]. |
| Unattainable | The individual perceives that the intervention has not achieved its purpose and did not meet personal goals. Sample code words / phrases: almost [helps], not very stable [blood pressure], not reduce dosage of medication, etc. |
| **7 - Self- efficacy** | The participant's confidence that they can perform the behaviour(s) required to participate in the intervention. Patient Categories: Home Monitoring of Blood Pressure, Lifestyle, Medical Adherence or Confidence Taking Medication. |
| Confident | The individual is confident that he/she can perform the behaviour(s) required to participate in the intervention and/or has successfully performed the behaviour without external aid. Sample code words / phrases: very confident, quite confident, very simple, positive about [engaging in the behaviour], no problem, super easy, etc. |
| Not confident | The individual is not confident that they can perform the behaviour(s) required to participate in the intervention and/or has not successfully performed the behaviour without external aid. Sample code words or phrases: [list of problems encountered that pose barriers to confidence]. |
| **SingHTN – Suggestions and Scalability** | Suggestions to improve, and recommendations on scaling up the intervention to other health conditions, other polyclinics, other polyclinic clusters |
| Recommendations |  |
| Conditions (others) | Suggestions to expand the program for other chronic conditions like diabetes, asthma etc. |
| Polyclinics (others) | Suggestions to expand the program to other SingHealth and other cluster polyclinics. |
| Suggestions  Telehealth  Positive Views      Neutral Views  Negative Views | Suggestions to improve the SingHTN programme.  Views on future uses of telehealth.  The individual has positive views about using telehealth in the future. Sample code words / phrases: good, well, better, best, positive, happy, satisfied, beneficial, useful, helpful, comfortable, willing to do that, open to it, important, don’t mind, no challenges, etc.  The individual has neutral views about using telehealth in the future. Sample code words / phrases: I never think about this, no opinions.  The individual has negative views about using telehealth in the future. Sample code words / phrases: prefer to come to clinic, lagging technical effect, difficult to communicate, no human or personal feel, need to prepare, difficult, seeing doctor is better, challenges with connectivity, [list of challenges or disadvantages]. |

**Supplementary Table 1a:** **Retrospective Acceptability Through HCPs’ Perspective of SingHypertension Intervention Based on the 7 Constructs of the Theoretical Framework of Acceptability and Illustrative Quotes**

| **Construct** | **Illustrative Quotes** |
| --- | --- |
| 1. Affective Attitude | “So, in a way, this study kind of, like, imposed on us to use the fixed drug combination tablet for patients who fit the criteria. And by doing that, we actually gave the patient the benefits of two medications in one pill. And in that way, we actually would manage to lower the blood pressure better for them with lesser tablets, hence improved their compliance.” HCW16, Physician (+)  “Some of the patients actually verbalized thanks when we gave them a call, and they managed to say that they have changed their diet to reduce their salt intake, and they have been doing a bit more exercises like brisk walking after the call had been made. And some of the patients even said they had lost their weight when they have exercised.” HCW01, Nurse (+) |
| 2. Burden | “I didn't think it had a huge strain on my usual practice. Because patients with hypertension were basically patients that we saw on a daily basis. So, the presence of the research coordinator helped in terms of the initial identification of the prospective patients that could be recruited into the study, and actually, after the first few recruitments, it was not too difficult to be familiar with the entire recruitment process, as well as what were the tests to order for the patients. With regards to subsequent follow-ups, (…) I think the research team had already sort of highlighted the group of patients that we should actively consider changing the medications for them even before their visits. So, that kind of already gave us a heads-up for the patients who came to the clinic. So, overall, I didn't think it was difficult to implement most of the essential bits of the research itself.” (HCW16, Physician) (+)  “I think I was given ample time to exercise these extra duties. So we were given properly...half the day to do our callings. So there's no interruption in between. We are being well prepared for the program. So it has not affected me in any way.” (HCW02, Nurse) (+) |
| 3. Ethicality | “In fact, I actually love the idea of a fixed-dose combination drug. Because it actually improves compliance a lot...” (HCW03, Physician) (+)  “I guess the goal for our SingHypertension program coincides with the goal of the management for patients with hypertension. Mainly we are targeting to, for their blood pressure to be controlled within the range. And also patients would be on regular follow-up with the clinic. It's actually advantage that in the SingHypertension program, nurses can do some follow-up care with the patient via the call on patient’s convenience. We can check on patients whether they are truly monitoring their blood pressure at home, and are there any difficulties they are facing. Or any concerns they have regarding their blood pressure from their monitoring at home.” (HCW01, Nurse) (+)  “I think we were not forward-looking enough in this project to advise the patients that this medication, the Hyzaar, would be actually an expensive medication and eventually the subsidize would stop. Whether or not the patients would be comfortable, eventually they had to switch back. Because, in a sense, we are using the discount on the medications to influence the patients' decision to switch, then once the discount stopped, the patients' decision would be to switch back to whichever medication that is cheaper for them. And a lot of the patients actually expressed lots of unhappiness, asking us why the discounts have to stop.” (HCW04, Physician) |
| 4. Intervention Coherence | It’s all about how to stratify the risk factors about the CVD risk assessment. So either its low medium risk. So accordingly they told us like if the risk factors are quite high right, then we need to change to the fixed dose combination, and we start the statins. HCW20, Physician. (+)  “Basically, as I explained, just to promote awareness in patient self-care management. We are actually calling patients every week for the first… depends on the duration. Then we follow up closely with the patient and then we get to know better about the patients, any problems they have encounter. And then this also will actually raise any problems that patients wants to ask us, or patients have any issues with their medication or their health issue. If not they will be seeing their doctor in a very short period of time. Usually about three months to four months.” (HCW19, Nurse) (+) |
| 5. Opportunity Costs | “Well, I don't think I gave up a lot of things for the purpose of the study. Like I said, the patients were not much more extraordinary compared to what we saw on a daily basis...of our regular hypertensive patients. But the difference was probably we spent a little bit more effort in terms of stratifying them more carefully into the high and very high risk groups versus the low to medium risk group. And then, following that, we would...implement more aggressively the treatment that was recommended for each group.” (HCW16, Physician). (+)  “No, no, so far no. Because my system was very good at allocating the...phone calls. She would rotate among about 4 or 5 of us. We would rotate and take turns to do the job so if, like, I was working in a very primary or core area, then she won't pull me out. She would ask me to work there and she would get somebody else who is not in the primary (area) to come out and do the calling. It's teamwork. It's teamwork, it's not by myself alone.” (HCW09, Nurse). (+) |
| 6. Perceived Effectiveness | “And the patients will come back, and you know and knowing the medications are free of charge, so they won’t mind me titrating the medication, yah. Instead of asking them you know, can I just increase the medicine, because every time you want to increase some medications you will have to think about the cost of the medications.” (HCW15, Physician). (+)  “I would feel that this program is quite a workable program for patients to control their blood pressure. Because there's a quite a systematic flow of the management from the doctor's visit, and the medication to be prescribed to the patients based on the blood test result, and the nurses who are making the phone call to the patients to check on them how is their management at home, and what are the concerns they have at home.” (HCW01, Nurse) (+) |
| 7. Self-efficacy | “In each of our rooms, we actually printed out the treatment algorithm and we referenced it every time we had a patient who was under the protocol, so it was... I mean, I would say that I was relatively confident because I had the protocol right in front of me every time (when) I was treating the patients in the SingHypertension study.” (HCW04, Physician). (+)  “And it gave me a lot of knowledge and I was able to handle difficult cases and difficult patients even in my polyclinic.” (HCW09, Nurse). (+) |

(+) indicates a positive reflection of the TFA construct ; (-) indicates a negative reflection of the TFA construct; (+) indicates a neutral reflection of the TFA construct

**Supplementary Table 1b: Retrospective Acceptability Through Patients’ Perspective of SingHypertension Intervention Based on the 7 Constructs of the Theoretical Framework of Acceptability and Illustrative Quotes**

| Construct | Illustrative Quotes |
| --- | --- |
| 1. Affective Attitude | “So it’s a… it’s a very lucky that we have this programme.” (Patient 3) (+)  “I just want to express my very… thankful lah you know lah this kind of programme that there is. Uh in a way you know it helps me in a lot of thing, managing all that kind of thing.” (Patient 4) (+) |
| 2. Burden | “It's not really, like, (a) disturbance to my daily activities…Not really, I don't have any of it. I just keep up on the daily intake. And normally as the first thing in the morning, I am aware of taking all these medications to keep me...I mean, it inside there.” (Patient 5) (+)  “Not cumbersome. Why? Because the interview did not take a long time. They were just (asking) those few most important, most fundamental questions that needed to be addressed every day.” (Patient 7) (+) |
| 3. Ethicality | “But, I feel comfortable like that lah, like you doing all these things lah. Maybe it will help patients more.” (Patient 1) (+)  “I think It is good, you all do the study atleast you know at least get some knowledge about point of view you know, and hopefully lah your research can help us also lah, you know.” (Patient 19) (+) |
| 4. Intervention Coherence | “We are more conscious on the food and also we will have to spend time to take the pressure because as you know human being is lazy and take for granted. But after you joined this, you will make it a habit every day at that hour.” (Patient 8) (+)  “Usually have exercise every day. But... I didn't eat too oily and salty diet like this. I cook it by myself, don’t put it too oily and salty.” (Patient 15) (+) |
| 5. Opportunity Costs | “No. So far I haven’t give up anything. No sacrifices been made.” (Patient 2) (+)  “So far, I haven't given up anything on this medication. (The) only thing is food...just maintain.” (Patient 11) (+) |
| 6. Perceived Effectiveness | “How does it fit... I think, like I've said, it's reminded you...if you take their suggestions and encouragement, sometimes you've got to invest... They will tell you to pick up with the daily routine and all these. If (there's) something the patient...I mean, something to guide the individual.” (Patient 5) (+)  “Recently everybody is saying that they want to have a reminder, a reminder to tell them not… for example, it’s not only about diet, like telling you to not overwork, to get into bed early. All of these are relevant to the BP.” (Patient 7) (+) |
| 7. Self-Efficacy | “No, no problem. (It's) super easy.” (Patient 11) (+)  “Quite confident lah. In terms of advice supposed to follow for me it is okay ah, its for my own benefits, for my own I just follow… Very confident lah!.” (Patient 18) (+) |

(+) indicates a positive reflection of the TFA construct ; (-) indicates a negative reflection of the TFA construct; (+) indicates a neutral reflection of the TFA construct

**Supplementary Table 1c: Feedback on SingHypertension Intervention, Sub-themes and Illustrative Quotes**

| **Sub-themes** | **Illustrative Quotes** |
| --- | --- |
| Recommendations for improving the SingHypertension Intervention | “I think is to make the algorithm less wordy, easier to understand, and just by eye-balling you will know what you need to do. Then the other thing is built it into the EMR system to guide the doctors on what to do. Of course, you need more IT support and AI into it to suggest (to) the doctors what is the recommendation. I thought this is something that can be done in the future.” (HCW03, Physician).  “The management support. Their understanding which is the extra workload. They cannot just say okay, this is something that we need to do, and you do it. But must understand that they need to design the system. They need to change the system somewhere to make it workable, instead of just ask the frontline staff to work harder.” (HCW11, Nurse).  “Well, for support strategies, of course, greater manpower...greater physician manpower definitely would help. Greater counselling resource, be it in the form of nursing manpower, or in the form of researchers who could do some of the counselling’s. I think that would be important. More resources could be put in to engage patients to do self-management. I think that would be important as well. Yeah.” (HCW16, Physician).  “Or maybe can conduct talks with doctors and nurses so that we can address issues together. I don’t know what the nurses are doing.” (HCW05, Physician).  “Yeah, a long-term subside for the patients. Or having a wider choice, I think, more of, like, guidance about what the targets are. And I think the doctor can kind of, like, have more autonomy over the antihypertensive medication to be chosen. I think that would be helpful.” (HCW08, Physician).  “And also, at the same time is to build rapport with the patients. Because sometimes when you call them, they don't know who they are talking to. So, it might be good, like, when you call them and after that, they schedule a counselling with the telecare’s in the clinic as well. So that they'll know that you are the one that is calling then or the team of hypertension nurses that they have spoken to, so they can feel the connection. Because sometimes when we called them and they would ask ' are you the one that I have talked to the last time?” (HCW12, Nurse). |
| 2.2 Scalability and applicability of the intervention | “Yes, definitely. Because other chronic conditions like diabetes, chronic kidney disease, these are all very much interlinked conditions, which affect cardiovascular risk for patients. So, again, risk stratification of patients is important for all these chronic conditions to actually improve their long-term outcomes and reduce the complication rate. So, having such a structured program definitely helps the physician to better identify the higher risk group right from the world goal, and hence implement the right treatment strategies for them.” (HCW16, Physician).  “I think probably .no need. Now we are still following the CPGs we have guidelines actually.” (HCW06, Physician).  “Maybe the clinics where they have a younger generation like, because elderly is bit difficult to do it over the phone as I said. Younger generation is like the population will be over the Sengkang, Punggol all this are younger, so most like they are more adaptive to this yeah, rather than..” (HCW18, Nurse).  “This specific flow I wouldn't recommend, but yes I would recommend, like, there to be certain protocols to better control...to help to guide doctors to better control blood pressure. Because like what I've said, this is too narrow (because) it's on only one drug. So I wouldn't recommend it to the other clinics, yeah.” (HCW08, Physician). |
